# Supplementary material for: Geographical Origin Differentiation of Rice by LC–MS-Based Non-Targeted Metabolomics
Source: MDPI journal article supplement (doi:10.3390/foods11213318), 2022-10-23
Supplement: s1 [file s1]

**Table S1.** Parameter settings of chromatographic conditions

| Device name                        | Parameter conditions              |
|------------------------------------|-----------------------------------|
| Chromatographic column type        | C18 column                        |
| Chromatographic column temperature | 40 °C                             |
| Flow rate                          | 0.2 mL min <sup>-1</sup>          |
| Mobile phase A                     | 5 mmol/L ammonium acetate, pH 9.0 |
| Mobile phase B                     | Methanol                          |

**Table S2.** Chromatographic gradient program setting parameters

| Time/min | A% | B%  |
|----------|----|-----|
| 0        | 98 | 2   |
| 1.5      | 98 | 2   |
| 3        | 0  | 100 |
| 10       | 0  | 100 |
| 10.1     | 98 | 2   |
| 11       | 98 | 2   |
| 12       | 98 | 2   |

**Table S3.** Condition parameter settings of MS

| Device name                      | Parameter conditions     |
|----------------------------------|--------------------------|
| Scanning mode                    | Anion mode               |
| Scanning range selection         | m/z 100-1500             |
| Spray voltage                    | 33.5 kV;                 |
| Sheath gas velocity              | 35 L/min                 |
| Auxiliary gas flow rate          | 10 L/min                 |
| Ion transfer tube temperature    | 320 °C                   |
| Ion Import RF Level              | 60                       |
| Auxiliary gas heater temperature | 350 °C                   |
| MS / MS Secondary Scanning       | Data Dependence Scanning |
