# Supplementary material for: Geographical Origin Differentiation of Rice by LC–MS-Based Non-Targeted Metabolomics
Source: Foods. 2022 Oct 23;11(21):3318. doi: 10.3390/foods11213318 (PMC9657058; doi:10.3390/foods11213318)
Supplement: Supplementary file 1 [file foods-11-03318-s001.zip]

Archive with 4 entries (4 files):
- Figure S1.pdf
- Figure S2.pdf
- Figure S3.pdf
- Tables S1-S3.pdf
