# Supplementary figures and images for: Geographical Origin Differentiation of Rice by LC–MS-Based Non-Targeted Metabolomics
Source: MDPI journal article supplement (doi:10.3390/foods11213318), 2022-10-23

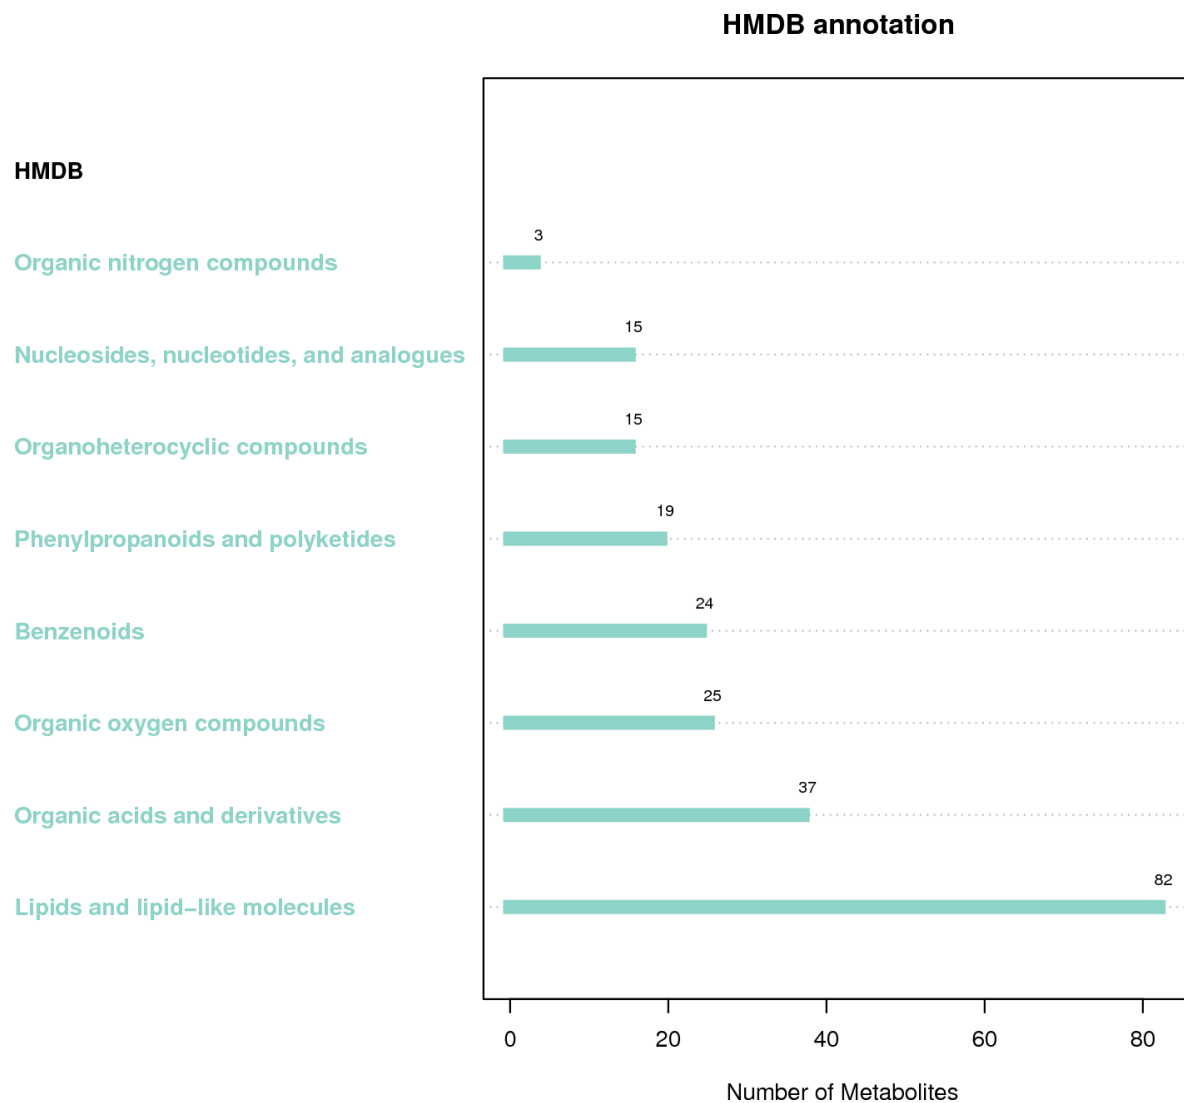

**Figure S3.** HMDB annotation results.

Supplement: s1 [file s1]

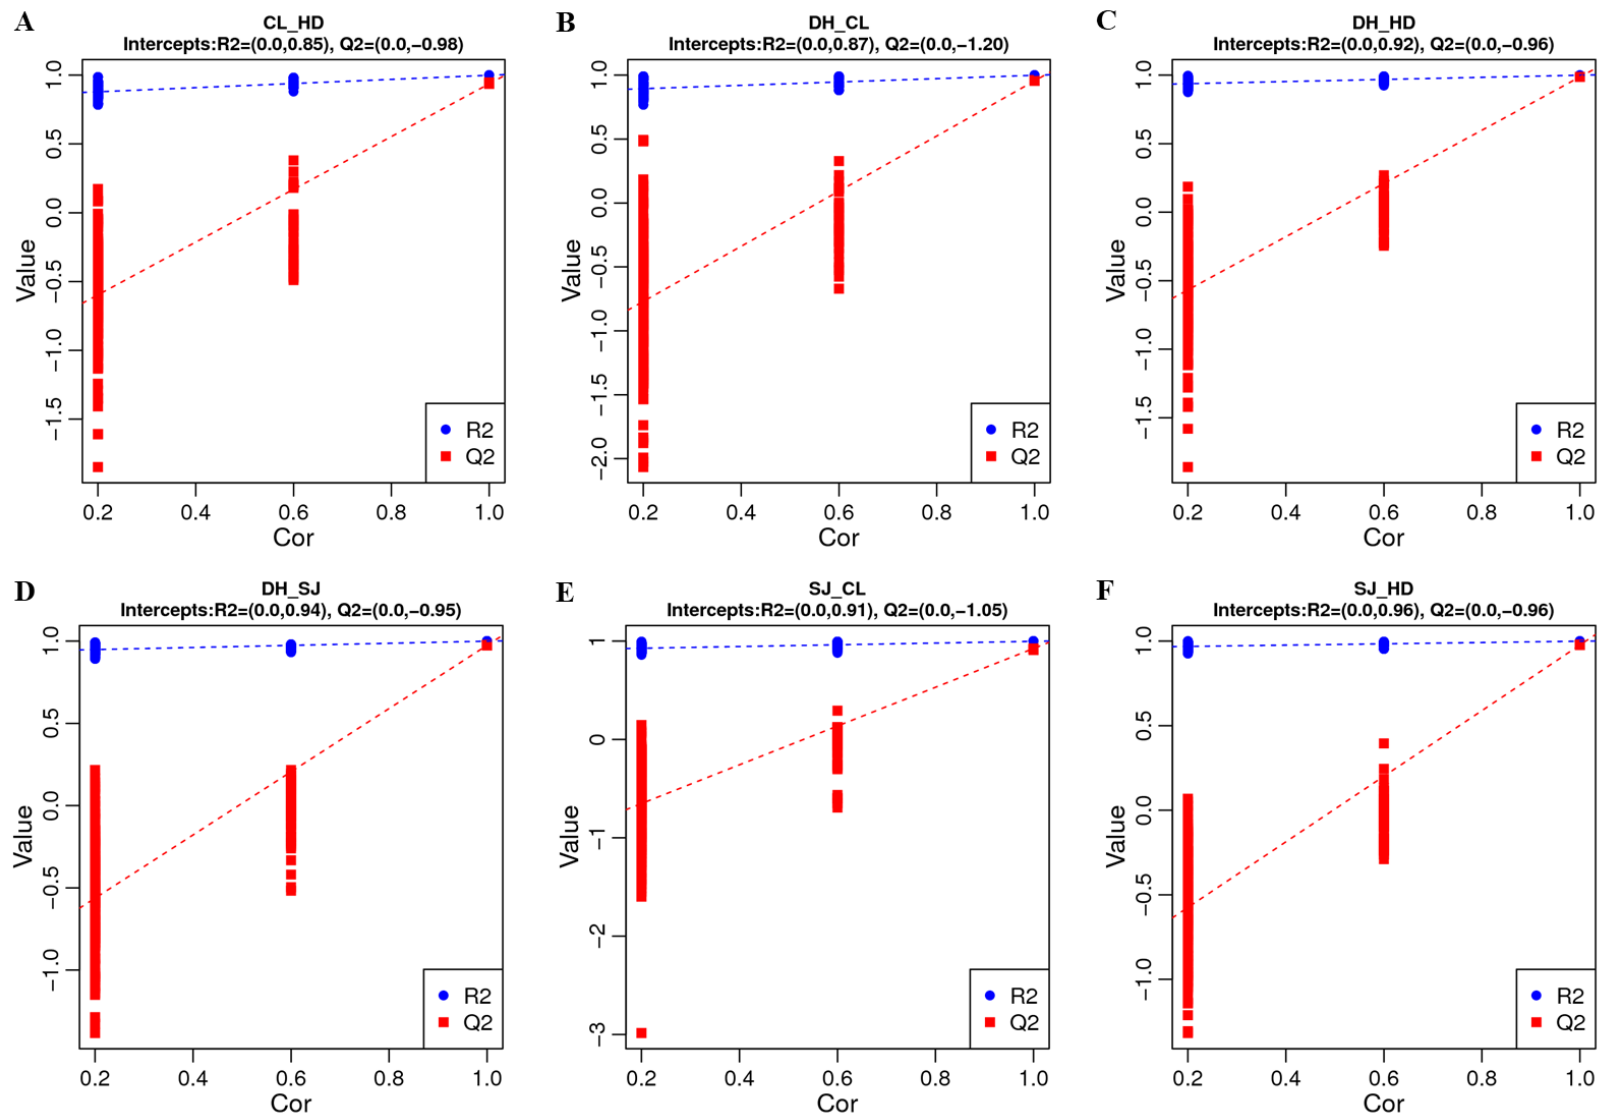

**Figure S1.** PLS-DA verification results. (A) CL vs HD; (B) CL vs DH; (C) DH vs HD; (D) DH vs SJ; (E) SJ vs CL; (F) SJ vs HD.

Supplement: s1 [file s1]

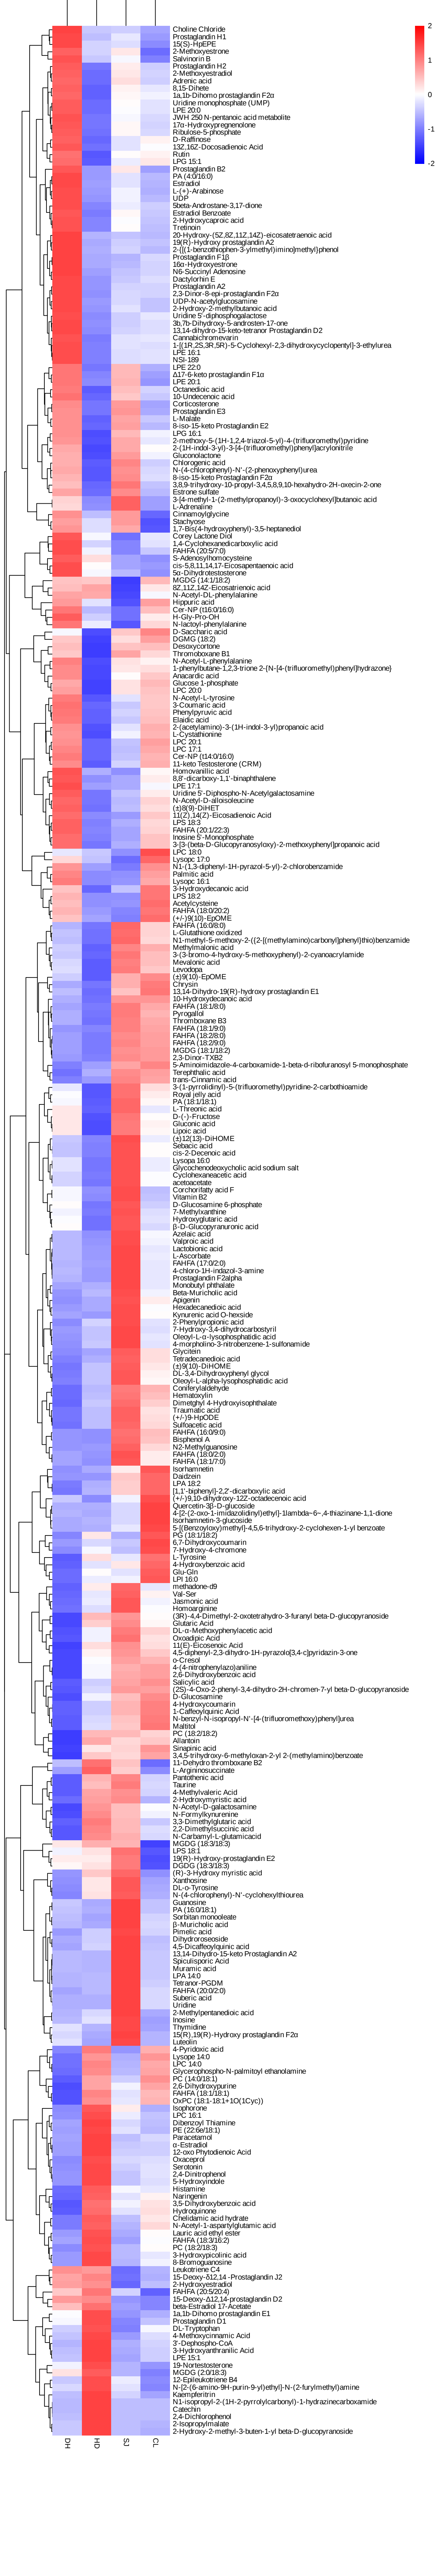

Supplement: s1 [file s1]
